# Supplementary material for: A flexible and self-formed sandwich structure strain sensor based on AgNW decorated electrospun fibrous mats with excellent sensing capability and good oxidation inhibition properties
Source: Royal Society of Chemistry journal article supplement (doi:10.1039/c7tc02429k), 2017-01-01
Supplement: c7tc02429k1.pdf [file c7tc02429k1.pdf]

## ***Supporting information***

### **A flexible and self-formed sandwich structure strain sensor based on AgNW decorated electrospun fibrous mats with excellent sensing capability and good oxidation inhibition property**

*Lijun Lu,<sup>1</sup> Xiangdong Wei,<sup>1</sup> Ye Zhang,<sup>2</sup> Guoqiang Zheng,<sup>1</sup> Kun Dai,<sup>1,3,\*</sup> Chuntai Liu,<sup>1</sup>*

*Changyu Shen,<sup>1</sup>*

<sup>1</sup> College of Materials Science and Engineering, The Key Laboratory of Material Processing and Mold of Ministry of Education, Zhengzhou University, Zhengzhou, PR China

<sup>2</sup> State Key Laboratory of Molecular Engineering of Polymers, Collaborative Innovation Center of Polymers and Polymer Composite Materials, Department of Macromolecular Science and Laboratory of Advanced Materials, Fudan University, Shanghai 200438, PR China.

<sup>3</sup> State Key Laboratory of Polymer Materials Engineering, Sichuan University, Chengdu, Sichuan 610065, PR China

*\*: Correspondence authors*

Tel.: +86-371-63887969;

E-mail addresses: kundai@zzu.edu.cn (K. D.)

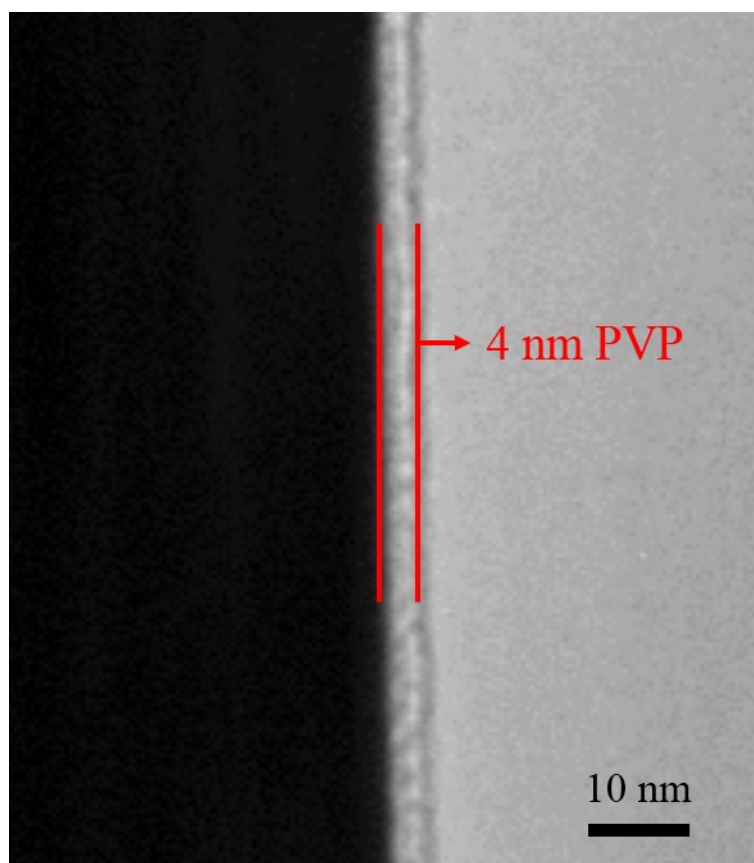

**Fig. S1.** TEM image of as-prepared AgNWs, showing 4 nm PVP absorbed on the surface.

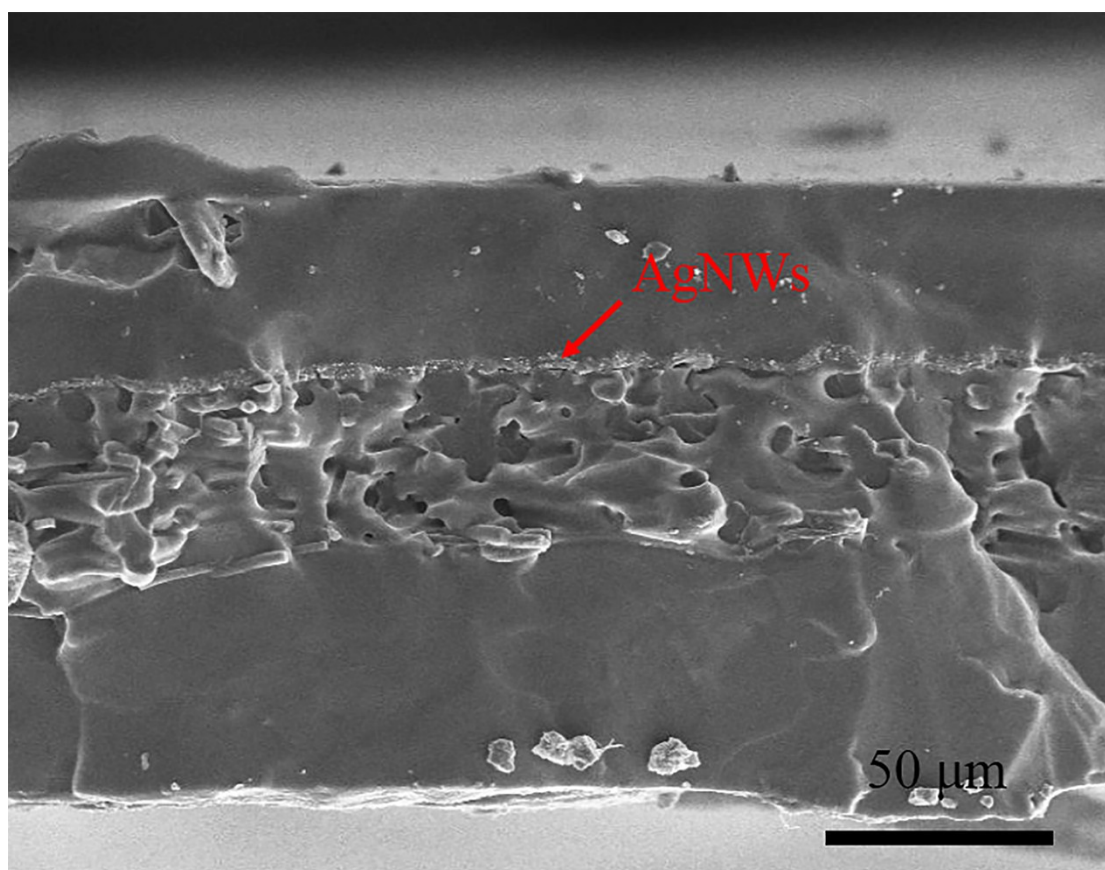

**Fig. S2.** Cross-sectional SEM image of an ATP strain sensor with self-formed sandwich structure with a higher magnification.

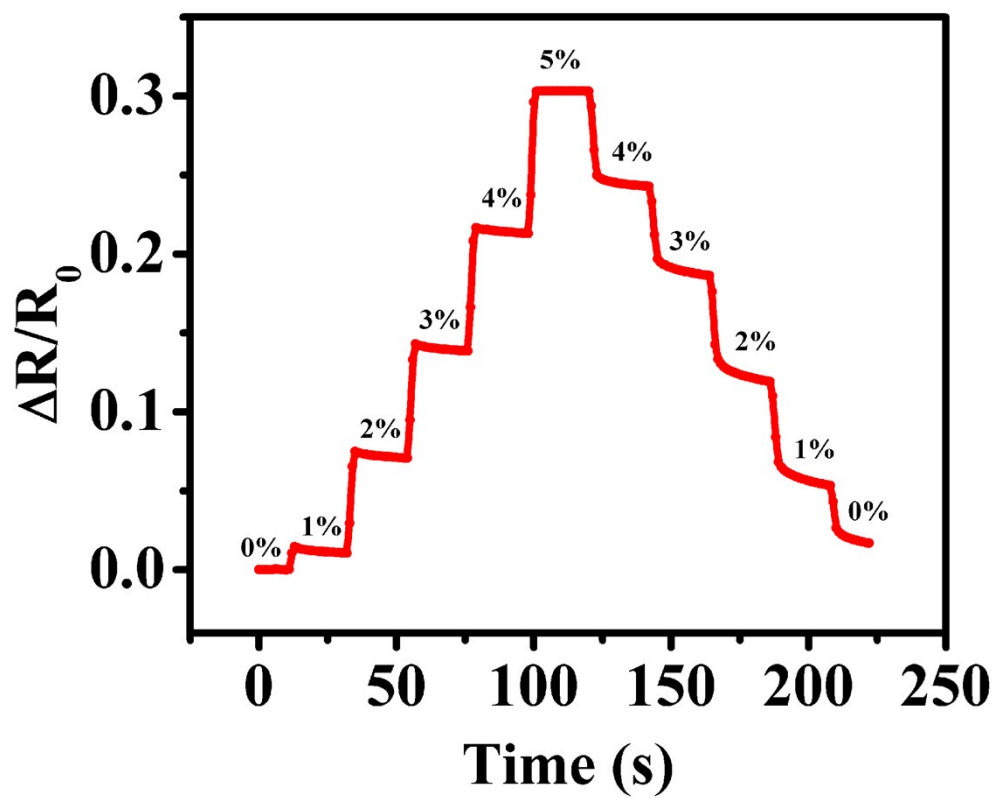

**Fig. S3.** A cycle of strain from 0% to 5% then back to 0%, being held at different strains.

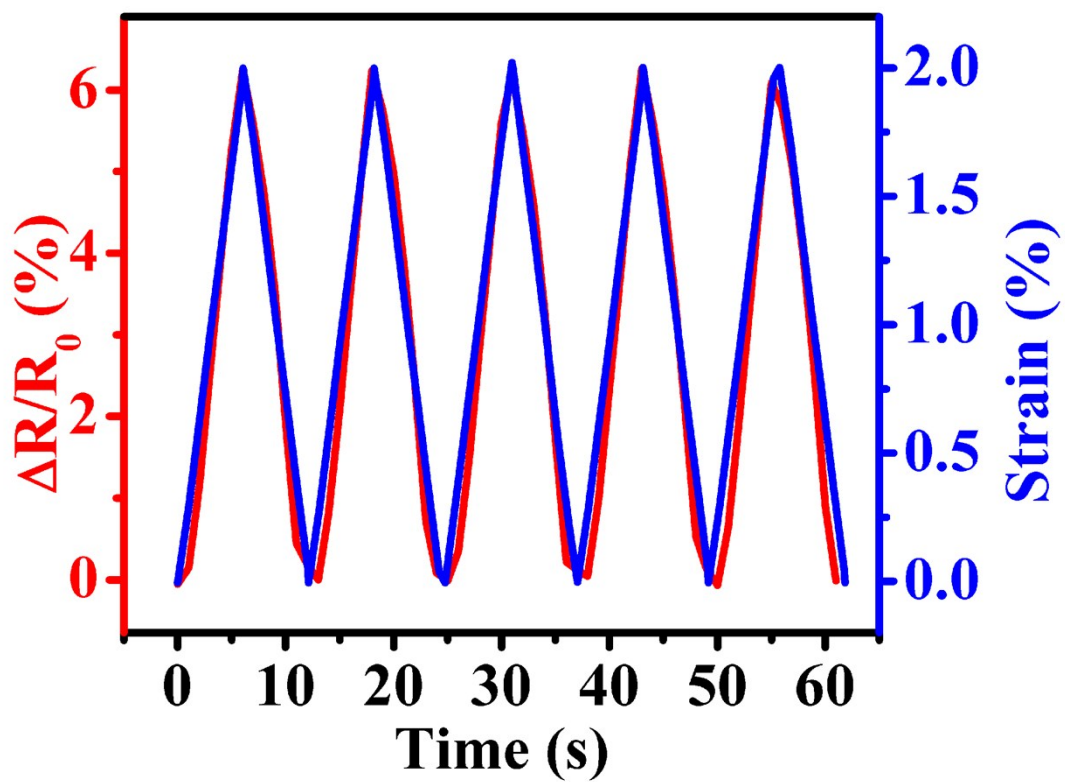

**Fig. S4.** Cycling test of ATP strain sensor; its relative resistance changes synchronously with the strain.

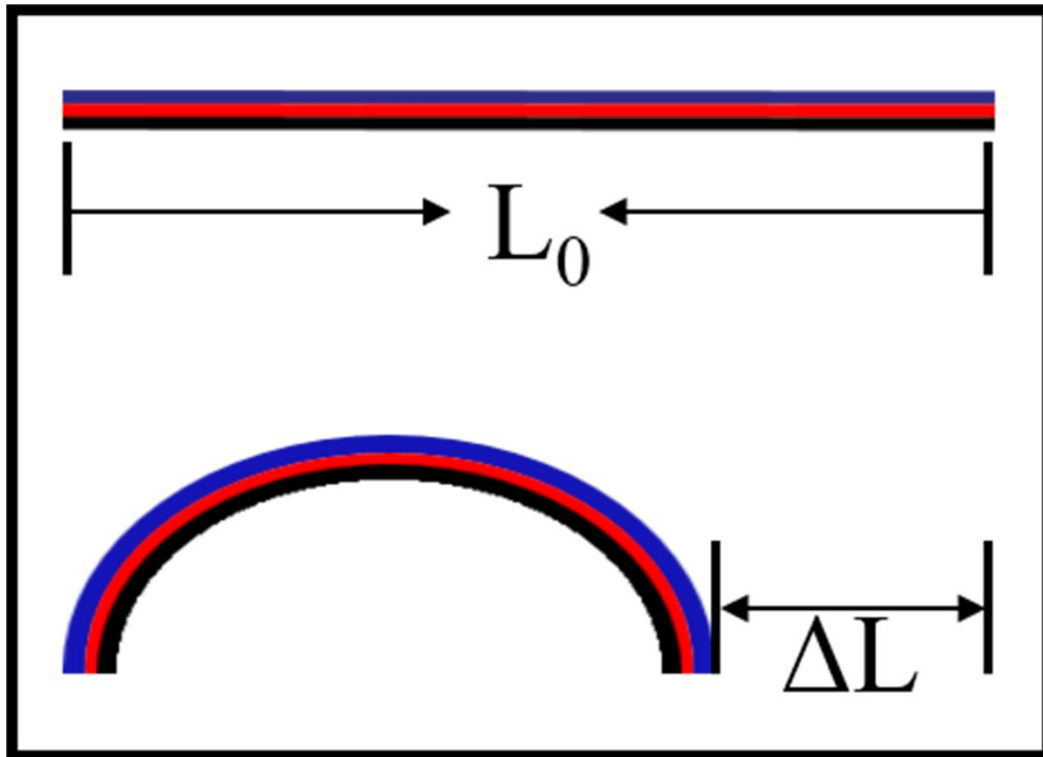

**Fig. S5.** Schematic illustration of bending an ATP strain sensor.

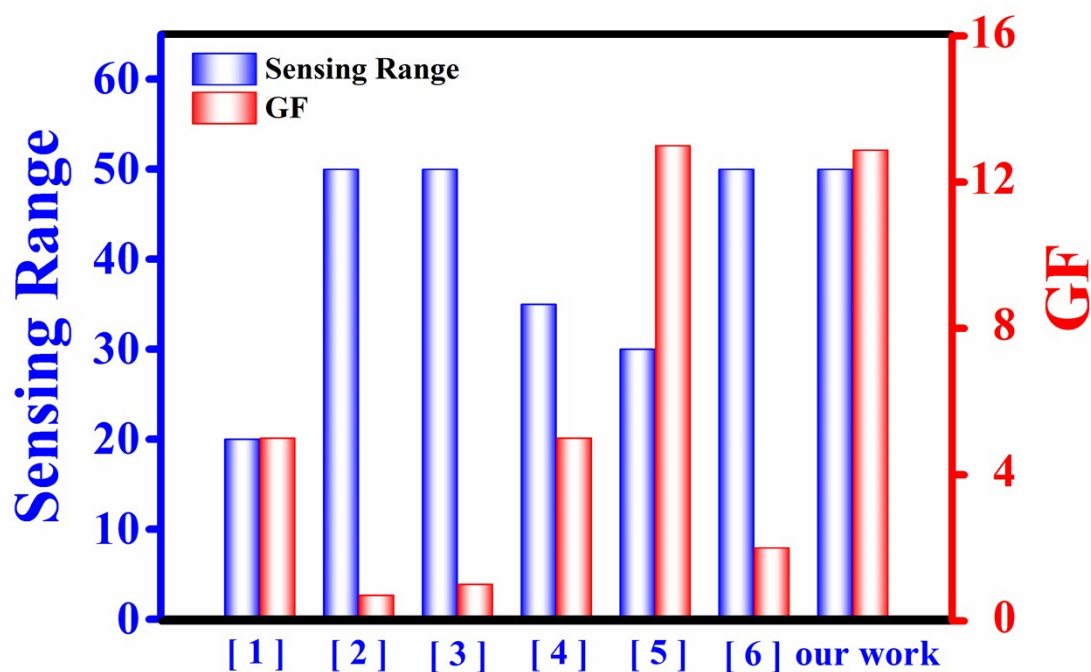

**Fig. S6.** Comparison on GF and sensing range of ATP strain sensors with previous works.

## References

1. N. Chou, Y. Kim and S. Kim, *ACS Appl. Mater. Interfaces*, 2016, **8**, 6269-6276.
2. S. Yao and Y. Zhu, *Nanoscale*, 2014, **6**, 2345-2352.
3. C. H. Zhu, L. M. Li, J. H. Wang, Y. P. Wu and Y. Liu, *RSC Adv.*, 2016, **7**, 51-57.
4. T. Cheng, Y. Z. Zhang, W. Y. Lai, Y. Chen, W. J. Zeng and W. Huang, *J. Mater. Chem. C*, 2014, **2**, 10369-10376.
5. L. Li, T. Zhang, Y. Liu and C. Zhu, *J. Mater. Sci-Mater. El.*, 2016, **27**, 3193-3201.
6. D. H. Kim, K. C. Yu, Y. Kim and J. W. Kim, *ACS Appl. Mater. Interfaces*, 2015, **7**, 15214-15222.
